# Supplementary material for: Prenatal thyroid hormones accelerate postnatal growth and telomere shortening in wild great tits
Source: Oxford University Press journal article supplement (doi:10.1242/jeb.243875), 2023-01-30
Supplement: jeb243875supp.pdf [file jeb243875supp.pdf]

**Table S1.** Linear mixed models (GLMM) on the effects of prenatal thyroid hormone elevation on nestling body mass and tarsus length at day 2, day 7, and day 14 post-hatching. The denominator degree of freedom (ddf) were approximated by the Kenward-Roger method to calculate p values.

| <b>(a) Body mass at day 2 (n = 218 nestlings)</b>                                                                                                         |           |                    |                    |        |           |       |       |
|-----------------------------------------------------------------------------------------------------------------------------------------------------------|-----------|--------------------|--------------------|--------|-----------|-------|-------|
| Random effects:                                                                                                                                           |           | Variance           | Std. Dev.          |        |           |       |       |
| Nest of origin (n=41)                                                                                                                                     | Intercept | 0.481              | 0.694              |        |           |       |       |
| Residual                                                                                                                                                  |           | 0.625              | 0.791              |        |           |       |       |
| Fixed factors                                                                                                                                             | Estimate  | SE                 | t                  | df     | F         | p     |       |
| Intercept                                                                                                                                                 |           | 3.849              | 0.123              | 31.426 |           |       |       |
| Hormone (TH)                                                                                                                                              |           | -0.402             | 0.245              | -1.639 | 1, 38.69  | 2.686 | 0.109 |
| Sample size: n = 99 control and 119 TH-supplemented                                                                                                       |           |                    |                    |        |           |       |       |
| The total sample size at day 2 (n =218 nestlings from 41 nests) was smaller than that at day 7 because we missed the day 2 for one nest (n = 7 nestlings) |           |                    |                    |        |           |       |       |
| <b>(b) Body mass at day 7 (n = 221 nestlings)</b>                                                                                                         |           |                    |                    |        |           |       |       |
| Random effects:                                                                                                                                           |           | Variance           | Std. Dev.          |        |           |       |       |
| Nest of origin (n=41)                                                                                                                                     | Intercept | 0.944              | 0.972              |        |           |       |       |
| Nest of rearing (n=41)                                                                                                                                    | Intercept | <0.001             | <0.001             |        |           |       |       |
| Residual                                                                                                                                                  |           | 1.482              | 1.217              |        |           |       |       |
| Fixed factors                                                                                                                                             | Estimate  | SE                 | t                  | df     | F         | p     |       |
| Intercept                                                                                                                                                 |           | 12.495             | 0.175              | 71.459 |           |       |       |
| Hormone (TH)                                                                                                                                              |           | -0.367             | 0.353              | -1.040 | 1, 38.93  | 1.081 | 0.305 |
| Cross-foster (yes)                                                                                                                                        |           | -0.347             | 0.179              | -1.945 | 1, 179.22 | 3.782 | 0.053 |
| Brood size                                                                                                                                                |           | -0.141             | 0.072              | -1.956 | 1, 25.71  | 3.828 | 0.061 |
| Hormone × Cross-foster                                                                                                                                    |           | 0.668              | 0.368              | 1.813  | 1, 28.49  | 3.286 | 0.080 |
| <b>(c) Tarsus length at day 7 (n = 221 nestlings)</b>                                                                                                     |           |                    |                    |        |           |       |       |
| Random effects:                                                                                                                                           |           | Variance           | Std. Dev.          |        |           |       |       |
| Nest of origin (n=41)                                                                                                                                     | Intercept | 0.4916             | 0.700              |        |           |       |       |
| Nest of rearing (n=41)                                                                                                                                    | Intercept | 0.000 <sup>§</sup> | 0.000 <sup>§</sup> |        |           |       |       |
| Residual                                                                                                                                                  |           | 0.982              | 0.991              |        |           |       |       |
| Fixed factors                                                                                                                                             | Estimate  | SE                 | t                  | df     | F         | p     |       |
| Intercept                                                                                                                                                 |           | 18.940             | 0.205              | 92.592 |           |       |       |
| Hormone (TH)                                                                                                                                              |           | -0.275             | 0.322              | -0.855 | 1, 42.78  | 0.731 | 0.397 |
| Cross-foster (yes)                                                                                                                                        |           | -0.330             | 0.146              | -2.268 | 1, 178.84 | 5.145 | 0.025 |
| Proportion of TH nestlings                                                                                                                                |           | -0.297             | 0.482              | -0.617 | 1, 54.90  | 0.381 | 0.540 |
| Measurer 2                                                                                                                                                |           | 0.211              | 0.199              | 1.059  | 2, 204.00 | 3.357 | 0.037 |
| Measurer 3                                                                                                                                                |           | 0.523              | 0.204              | 2.561  |           |       |       |
| Hormone × proportion of TH nestlings                                                                                                                      |           | -1.711             | 0.972              | -1.762 | 1, 58.65  | 3.103 | 0.083 |

Sample size: n = 104 control and 117 TH-supplemented

<sup>§</sup> Singular fit (i.e. insufficient data to reliably estimate the variance)

**Table S1 (cont.)**

| <b>(d) Body mass at day 14 (n = 99 nestlings)</b>     |           |                    |                    |          |       |       |
|-------------------------------------------------------|-----------|--------------------|--------------------|----------|-------|-------|
| Random effects:                                       |           | Variance           | Std. Dev.          |          |       |       |
| Nest of origin (n=34)                                 | Intercept | 0.310              | 0.557              |          |       |       |
| Nest of rearing (n=19)                                | Intercept | 0.228              | 0.477              |          |       |       |
| Residual                                              |           | 0.801              | 0.895              |          |       |       |
| Fixed factors                                         | Estimate  | SE                 | t                  | df       | F     | p     |
| Intercept                                             | 18.603    | 0.176              | 105.693            |          |       |       |
| Hormone (TH)                                          | 0.099     | 0.303              | 0.747              | 1, 22.45 | 0.130 | 0.722 |
| <b>(e) Tarsus length at day 14 (n = 99 nestlings)</b> |           |                    |                    |          |       |       |
| Random effects:                                       |           | Variance           | Std. Dev.          |          |       |       |
| Nest of origin (n=34)                                 | Intercept | 0.132              | 0.363              |          |       |       |
| Nest of rearing (n=19)                                | Intercept | 0.000 <sup>§</sup> | 0.000 <sup>§</sup> |          |       |       |
| Residual                                              |           | 0.283              | 0.532              |          |       |       |
| Fixed factors                                         | Estimate  | SE                 | t                  | df       | F     | p     |
| Intercept                                             | 23.199    | 0.238              | 97.313             |          |       |       |
| Hormone (TH)                                          | 0.157     | 0.175              | 0.899              | 1, 27.77 | 0.808 | 0.376 |
| Measurer 2                                            | -0.488    | 0.265              | -1.845             | 2, 61.90 | 4.014 | 0.023 |
| Measurer 3                                            | -0.066    | 0.256              | -0.258             |          |       |       |

Sample sizes: n = 50 control and 49 TH-supplemented

<sup>§</sup> Singular fit (i.e. insufficient data to reliably estimate the variance)

**Table S2.** Linear mixed models of blood oxidative stress biomarkers in response to prenatal TH-supplementation.

| <b>(a) total GSH <math>\mu\text{mol}/\text{mg}</math> protein (n = 58 nestlings)</b> |           |          |           |          |       |       |
|--------------------------------------------------------------------------------------|-----------|----------|-----------|----------|-------|-------|
| Random effects:                                                                      |           | Variance | Std. Dev. |          |       |       |
| Nest of origin (n=29)                                                                | Intercept | 0.031    | 0.177     |          |       |       |
| Nest of rearing (n=18)                                                               | Intercept | 0.050    | 0.223     |          |       |       |
| Residual                                                                             |           | 0.044    | 0.210     |          |       |       |
| Fixed factors                                                                        | Estimate  | SE       | t         | df       | F     | p     |
| Intercept                                                                            | -1.492    | 0.114    | -13.148   |          |       |       |
| Hormone (TH)                                                                         | 0.014     | 0.105    | 0.128     | 1, 15.46 | 0.016 | 0.900 |
| GSH assay batch                                                                      | 0.221     | 0.145    | 1.526     | 1, 16.57 | 2.328 | 0.146 |
| <b>(b) GSH:GSSG ratio (n = 58 nestlings)</b>                                         |           |          |           |          |       |       |
| Random effects:                                                                      |           | Variance | Std. Dev. |          |       |       |
| Nest of origin (n=29)                                                                | Intercept | 0.210    | 0.458     |          |       |       |
| Nest of rearing (n=18)                                                               | Intercept | 0.031    | 0.175     |          |       |       |
| Residual                                                                             |           | 0.134    | 0.367     |          |       |       |
| Fixed factors                                                                        | Estimate  | SE       | t         | df       | F     | p     |
| Intercept                                                                            | -3.106    | 0.181    | -17.207   |          |       |       |
| Hormone (TH)                                                                         | -0.171    | 0.243    | -0.703    | 1, 16.75 | 0.456 | 0.509 |
| Body mass                                                                            | 0.106     | 0.059    | 1.794     | 1, 41.88 | 2.986 | 0.091 |
| Proportion of TH-nestlings                                                           | -0.173    | 0.462    | -0.375    | 1, 21.30 | 0.124 | 0.728 |
| GSH assay batch                                                                      | 0.133     | 0.237    | 0.561     | 1, 16.87 | 0.307 | 0.587 |
| Hormone $\times$ Proportion of TH-nestlings                                          | 1.787     | 0.926    | 1.930     | 1, 19.81 | 3.553 | 0.074 |
| <b>(c) MDA <math>\text{nmol}/\mu\text{g}</math> protein (n = 59 nestlings)</b>       |           |          |           |          |       |       |
| Random effects:                                                                      |           | Variance | Std. Dev. |          |       |       |
| Nest of origin (n=30)                                                                | Intercept | 0.004    | 0.059     |          |       |       |
| Nest of rearing (n=18)                                                               | Intercept | 0.004    | 0.060     |          |       |       |
| TBARS batch (n = 6)                                                                  | Intercept | 0.100    | 0.317     |          |       |       |
| Residual                                                                             |           | 0.039    | 0.198     |          |       |       |
| Fixed factors                                                                        | Estimate  | SE       | t         | df       | F     | p     |
| Intercept                                                                            | -3.286    | 0.135    | -24.340   |          |       |       |
| Hormone (TH)                                                                         | 0.036     | 0.067    | 0.536     | 1, 16.86 | 0.287 | 0.599 |

Sample sizes:

total GSH and GSH:GSSG ratio, n = 26 control and 32 TH-supplemented

MDA, n = 26 control and 33 TH-supplemented

**Table S3.** Linear mixed models of blood plasma thyroid hormones growth in response to prenatal TH-supplementation.

| <b>(a) T3 pmol/ml (n = 24 nestlings)</b> |                 |                 |                  |           |          |          |
|------------------------------------------|-----------------|-----------------|------------------|-----------|----------|----------|
| <b>Random effects:</b>                   |                 | <b>Variance</b> | <b>Std. Dev.</b> |           |          |          |
| <b>Nest of origin (n=18)</b>             | Intercept       | 0.054           | 0.232            |           |          |          |
| <b>Nest of rearing (n=11)</b>            | Intercept       | 0.127           | 0.357            |           |          |          |
| <b>Residual</b>                          |                 | 0.132           | 0.363            |           |          |          |
| <b>Fixed factors</b>                     | <b>Estimate</b> | <b>SE</b>       | <b>t</b>         | <b>df</b> | <b>F</b> | <b>p</b> |
| <b>Intercept</b>                         | 1.218           | 0.147           | 8.273            |           |          |          |
| <b>Hormone (TH)</b>                      | -0.026          | 0.202           | -0.128           | 1, 7.37   | 0.016    | 0.902    |
| <b>(b) T4 pmol/ml (n = 24 nestlings)</b> |                 |                 |                  |           |          |          |
| <b>Random effects:</b>                   |                 | <b>Variance</b> | <b>Std. Dev.</b> |           |          |          |
| <b>Nest of origin (n=18)</b>             | Intercept       | 0.738           | 0.859            |           |          |          |
| <b>Nest of rearing (n=11)</b>            | Intercept       | 2.934           | 1.713            |           |          |          |
| <b>Residual</b>                          |                 | 5.721           | 2.392            |           |          |          |
| <b>Fixed factors</b>                     | <b>Estimate</b> | <b>SE</b>       | <b>t</b>         | <b>df</b> | <b>F</b> | <b>p</b> |
| <b>Intercept</b>                         | 7.452           | 0.758           | 9.837            |           |          |          |
| <b>Hormone (TH)</b>                      | -0.041          | 1.113           | -0.037           | 1, 6.57   | 0.001    | 0.973    |
| <b>Sex</b>                               | 2.101           | 1.119           | 1.877            | 1, 14.99  | 2.532    | 0.132    |

Sample sizes: n = 11 control and 13 TH-supplemented
